# Supplementary material
Source: PubMed Central journal article supplement (PMC4184946)

**A**

7-Week APC<sup>Min/+</sup>

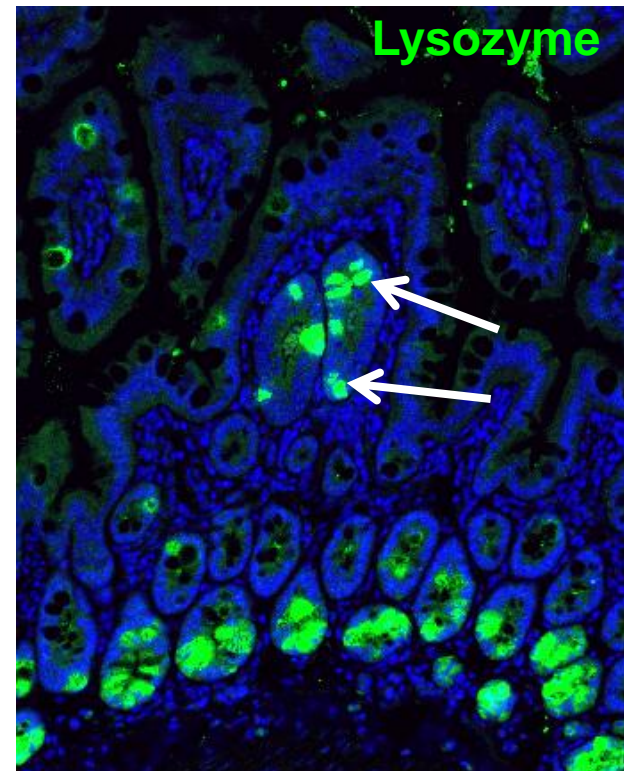

**B**

APC<sup>Min/+</sup>; Cdc42<sup>fl/fl</sup>; Vil-Cre

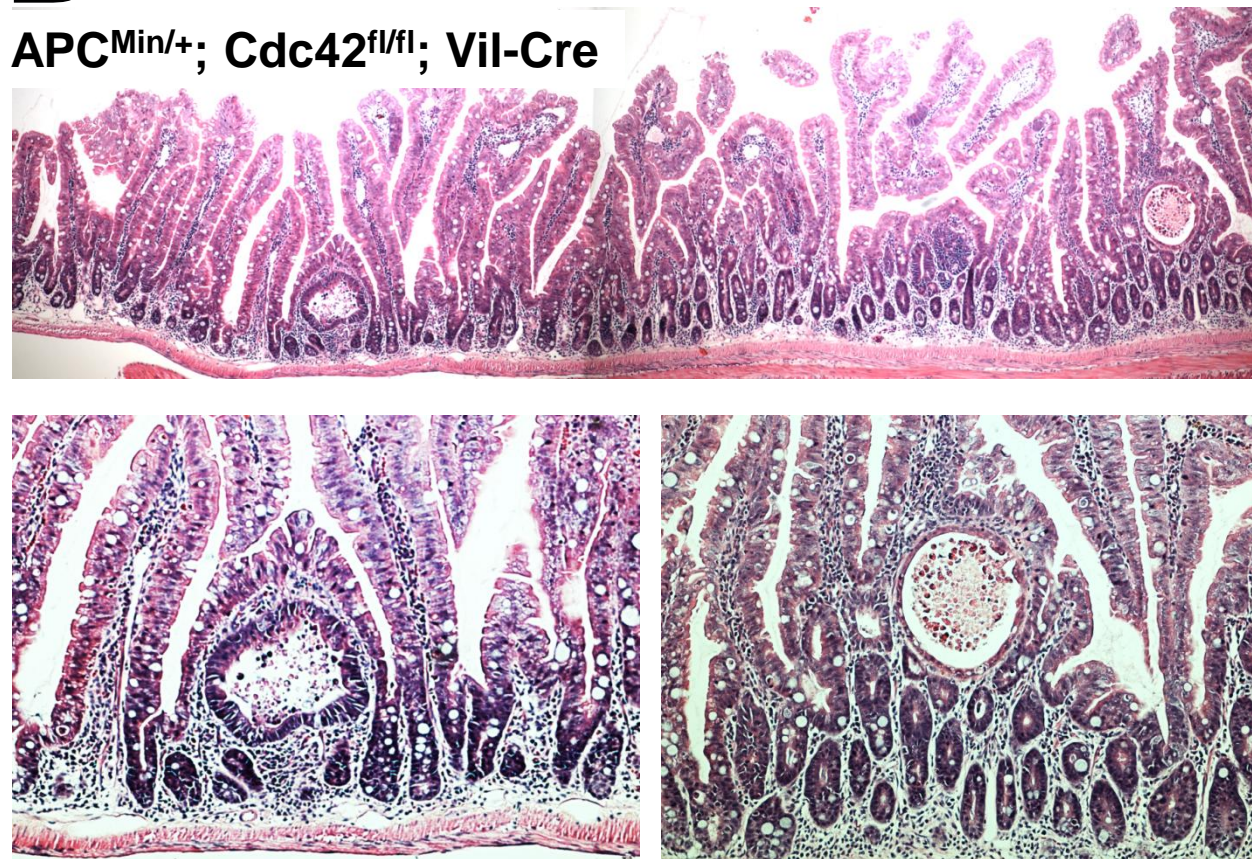

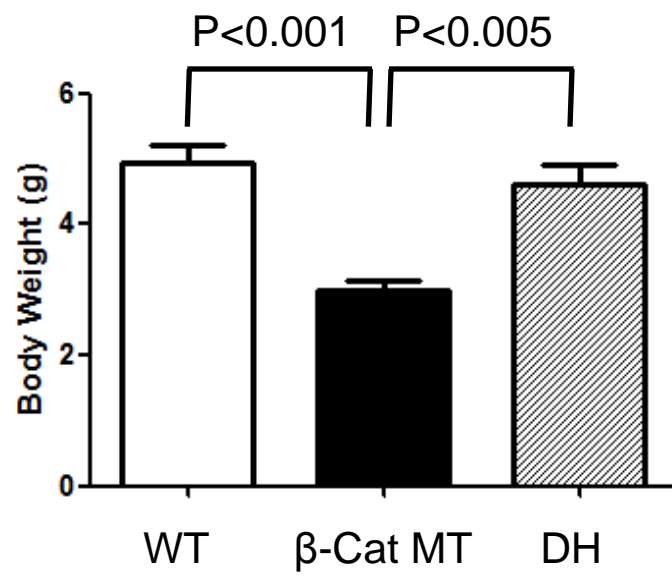

**Catnb<sup>(ex3)/+</sup>; Cdc42<sup>fl/fl</sup>; Vil-Cre**

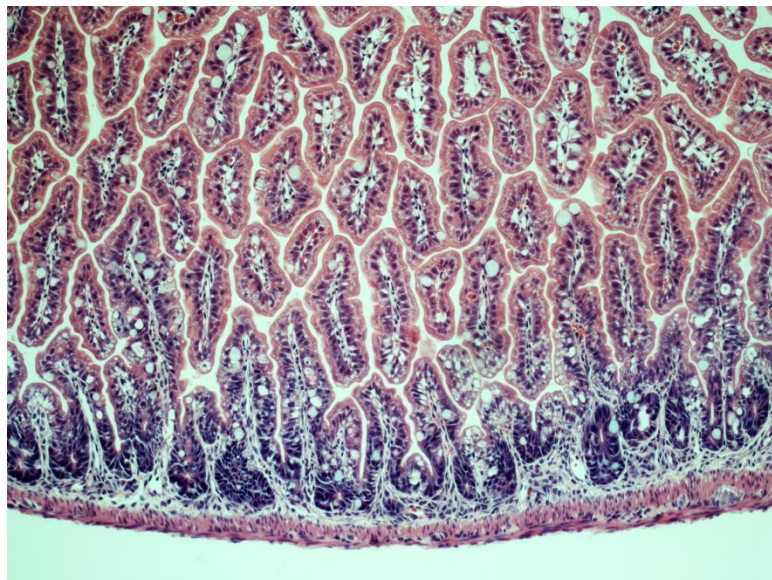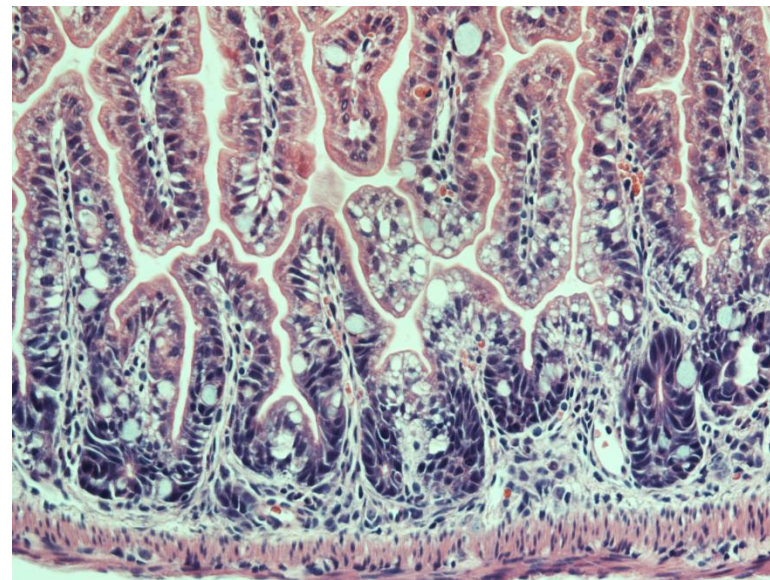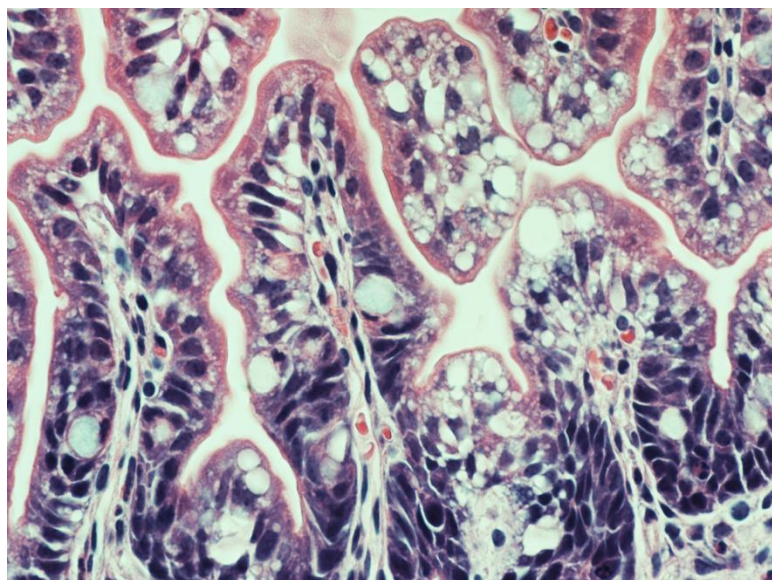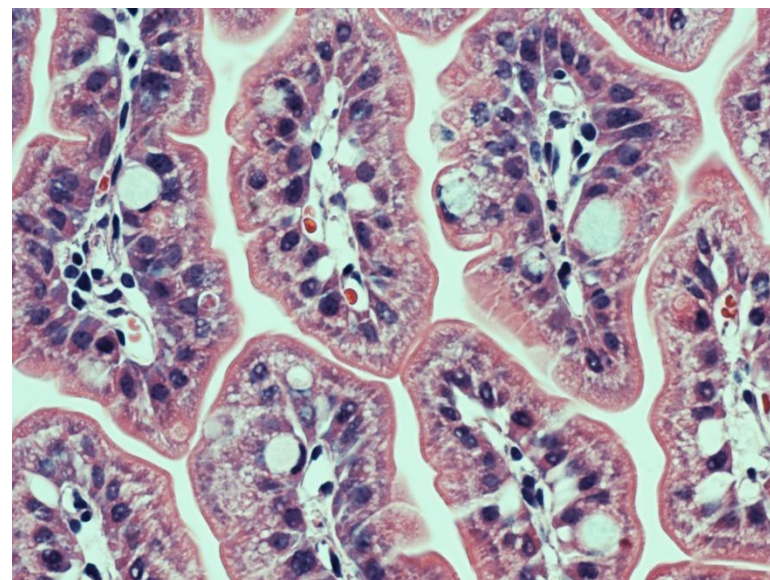

**Wild Type**

**Lysozyme**

**Catnb<sup>lox(ex3)/+</sup>; VillinCre**

**Lysozyme**

**Catnb<sup>lox(ex3)/+</sup>;  
Cdc42<sup>fl/+</sup>; VillinCre**

**Lysozyme**

**Lysozyme**

**Lysozyme**

**Lysozyme**

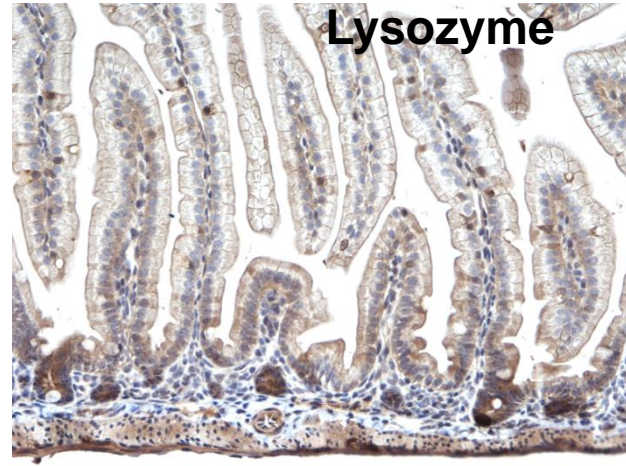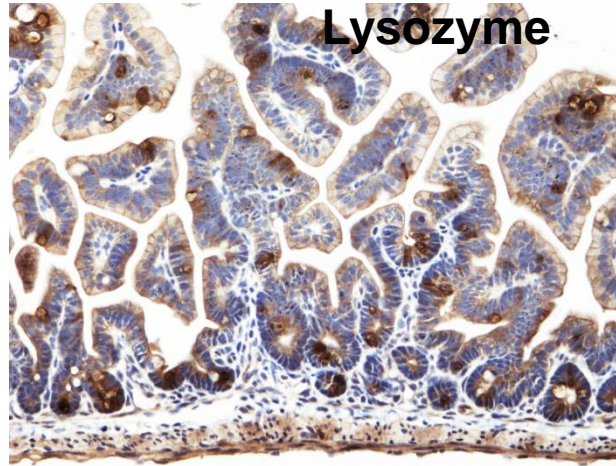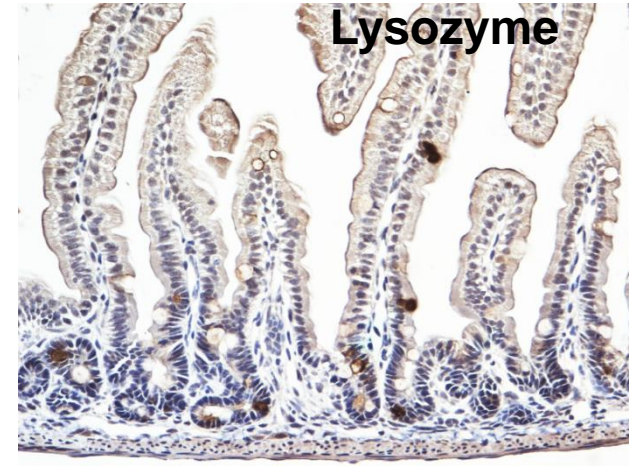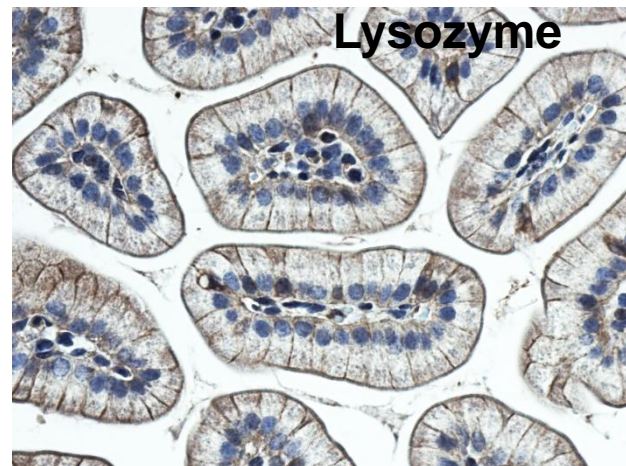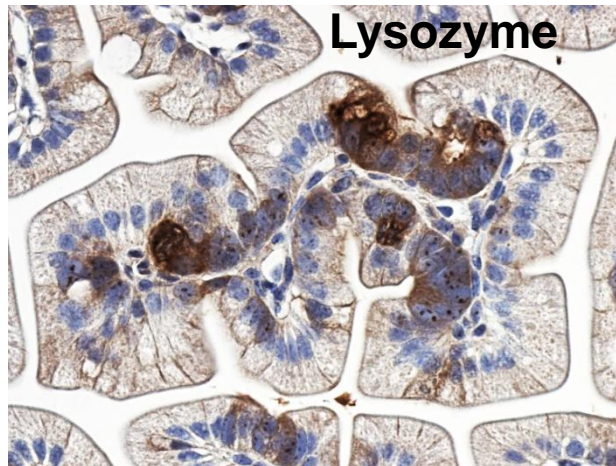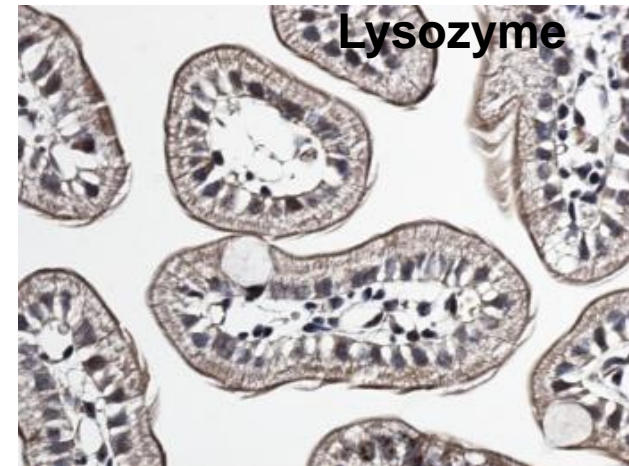

**A**

|             | LIM1863 | LIM2551 | LIM1899 | LIM1215 | SW480  | LIM2550 | Caco2  |
|-------------|---------|---------|---------|---------|--------|---------|--------|
| <b>G1</b>   | 48.81%  | 46.34%  | 66.60%  | 33.06%  | 17.95% | 35.26%  | 35.76% |
| <b>S</b>    | 47.55%  | 42.74%  | 29.95%  | 55.81%  | 64.94% | 51.75%  | 46.18% |
| <b>G2/M</b> | 3.64%   | 10.92%  | 3.46%   | 11.13%  | 17.11% | 12.99%  | 18.06% |

**B**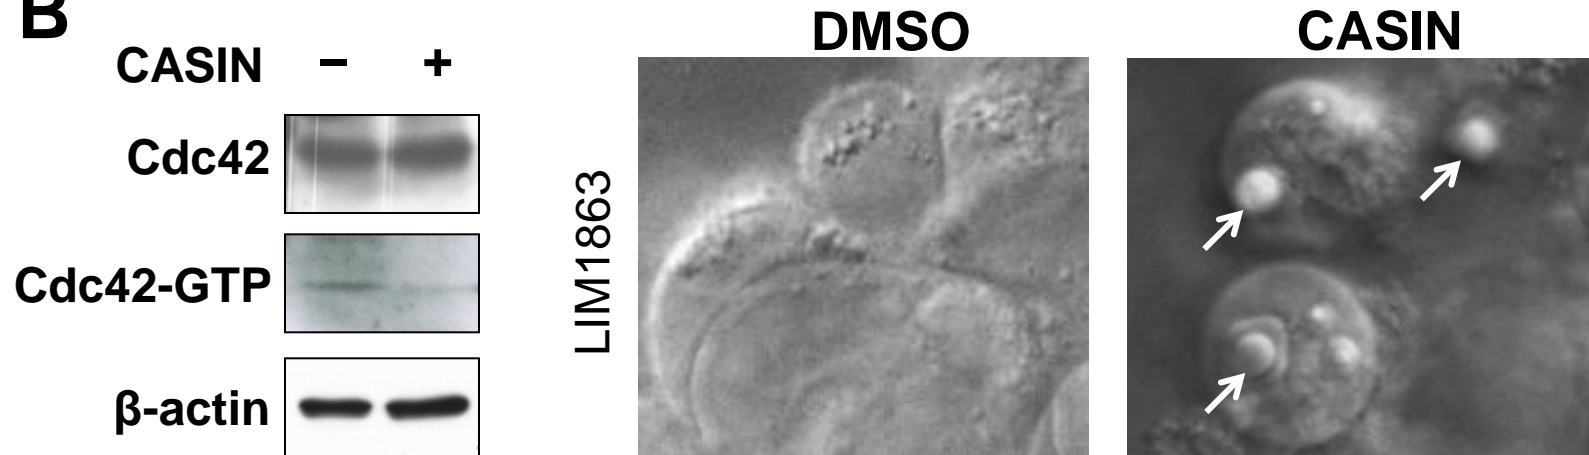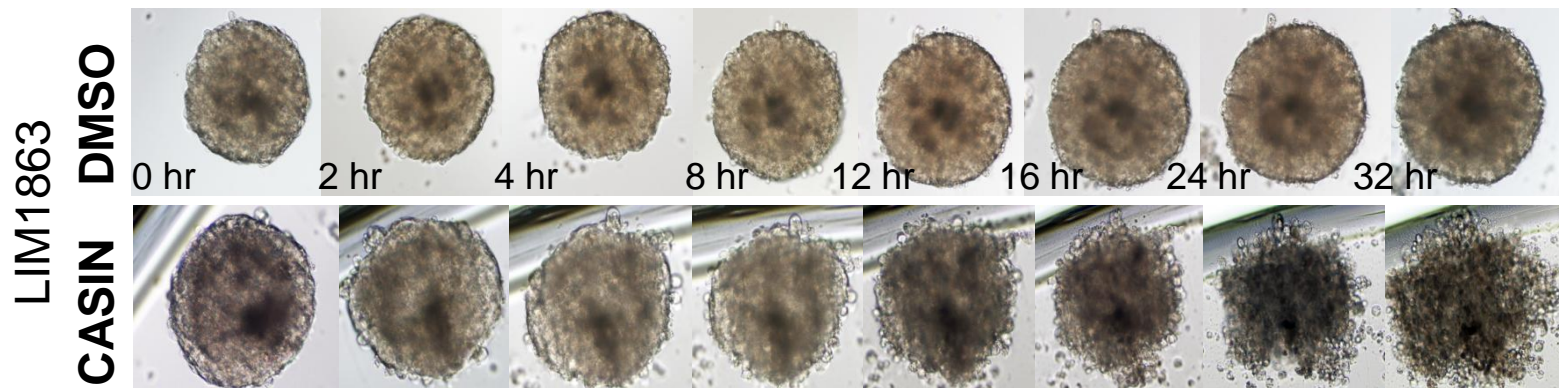

Supplement: NIHMS620724-supplement-1.pdf [file NIHMS620724-supplement-1.pdf]
